# Supplementary material
Source: PubMed Central journal article supplement (PMC6124631)
Supplement: dyx002_appendix.pdf [file dyx002_appendix.pdf]

## Appendix to “Pleiotropy-robust Mendelian Randomization”

### 1. Simulation study setup

As in Bowden et al. (2015), the data for the simulation were generated according to the following model:

$$U = G\varphi + \varepsilon^U \quad (\text{A1})$$

$$X = G\gamma + U + \varepsilon^X \quad (\text{A2})$$

$$Y = X\beta + G\alpha + U + \varepsilon^Y \quad (\text{A3})$$

This is a more general model than model 1 and 2 in the main text, because it additionally allows the genetics variants that are being used as instrumental variables to have an influence on an unobserved confounding variable  $U$ . If  $\varphi_j = 0$  for all genetic variants, this model reduces to model 1 and 2. If  $\varphi_j \neq 0$  for a genetic variant, this introduces a violation of the independence assumption.

In each simulation run, one sample of 1,000 individuals is generated. Matrix  $G$  contains 25 independently generated SNPs with a minor allele frequency of 0.30. The error terms in the three equations come from three independent normal distributions with mean 0 and variance 2. The effect  $\gamma_j$  of the genetic variant on exposure  $X$  is drawn from a uniform distribution on the interval 0.5-4.0.

We consider four different scenarios (InSIDE refers to the “Instrument Strength Independent of Direct Effect” assumption):

1. No pleiotropy, InSIDE satisfied:  $\alpha_j = 0$ ,  $\varphi_j = 0$ .
2. Balanced pleiotropy, InSIDE satisfied:  $\alpha_j \sim \text{Uniform}(-0.2, 0.2)$ ,  $\varphi_j = 0$ .

3. Directional pleiotropy, InSIDE satisfied:  $\alpha_j \sim \text{Uniform}(0,0.2)$ ,  $\varphi_j = 0$ ;
4. Directional pleiotropy, InSIDE not satisfied:  $\alpha_j \sim \text{Uniform}(0,0.2)$ ,  $\varphi_j \sim \text{Uniform}(0,0.5)$ .

Each scenario is simulated with a null effect ( $\beta = 0$ ) and a positive effect ( $\beta = 0.05$ ). For PRMR, we assume  $\alpha_j$  and  $\varphi_j$  are known in the simulations reported in Table 1 of the main text. The simulation results are based on 10,000 runs.

For the simulations reported in Table 2 in the main text, we simulate a second sample using 250, 500 and 1,000 individuals with (i)  $\gamma_j = 0$  (zero first stage) and (ii)  $\alpha_j = \alpha_j \times \xi$  (non homogenous pleiotropic effects), with  $0.5 \leq \xi \leq 1.5$ . Only for PRMR we use this subsample to obtain estimates of  $\alpha_j$ , while for the other methods, this subsample is not used in the analysis. If we include this additional subsample in the analyses for 2SLS, IVW, and MR-Egger, this only increases the bias of these methods since we add a group of individuals without a first stage, decreasing the first stage  $F$ -statistic (results available upon request).

## **2. STATA code simulation study**

See *PRMR\_simulation\_study\_final.do* below.

## **3. STATA code empirical examples**

See *script\_PRMR\_UKB\_final.do* below.

## **4. References**

Bowden J, Davey Smith G, Burgess S. Mendelian randomization with invalid instruments: effect estimation and bias detection through Egger regression. *Int J Epidemiol* 2015;**44**:512–525.
